# Supplementary material for: Potential anticancer and antioxidant lauric acid-based hydrazone synthesis and computational study toward the electronic properties
Source: Royal Society of Chemistry journal article supplement (doi:10.1039/d3ra02433d), 2023-01-01
Supplement: d3ra02433d1.pdf [file d3ra02433d1.pdf]

## Supplementary Information

### Potential anticancer and antioxidant lauric acid based hydrazones synthesis and computational slant towards the electronic properties

Mohammed A. Assiri,<sup>1</sup> Akbar Ali,<sup>2</sup> Muhammad Ibrahim,<sup>\*3</sup> Muhammad Usman Khan,<sup>\*4</sup> Khalid Ahmed,<sup>5</sup> Muhammad Sajid Hamid Akash,<sup>6</sup> Akhtar Abbas,<sup>3</sup> Athar Javed,<sup>3</sup> Muhammad Suleman,<sup>7</sup> Muhammad Khalid,<sup>8,9</sup> Ishtiaq Hussain,<sup>10</sup>

<sup>1</sup>*Department of Chemistry, Faculty of Science, King Khalid University, P.O. Box 9004, Abha 61413, Saudi Arabia*

<sup>2</sup>*Department of Chemistry, Government College University Faisalabad, Faisalabad-38000, Pakistan*

<sup>3</sup>*Department of Applied Chemistry, Government College University Faisalabad, Faisalabad-38000, Pakistan*

<sup>4</sup>*Department of Chemistry, University of Okara, Okara-56300, Pakistan*

<sup>5</sup>*H. E. J. Research Institute of Chemistry, International Center for Chemical and Biological Sciences, University of Karachi, Karachi-75270, Pakistan*

<sup>6</sup>*Department of Pharmaceutical Chemistry, Government College University Faisalabad*

<sup>7</sup>*Department of Chemistry, Riphah International University Faisalabad Campus, Pakistan*

<sup>8</sup>*Institute of Chemistry, Khwaja Fareed University of Engineering & Information Technology, Rahim Yar Khan-64200, Pakistan*

<sup>9</sup>*Centre for Theoretical and Computational Research, Khwaja Fareed University of Engineering & Information Technology, Rahim Yar Khan-64200, Pakistan*

<sup>10</sup>*Department of Pharmaceutical Sciences, Pak-Austria Fachhochschule Institute of applied sciences and technology Mang Haripure, Khyber Pakhtunkhwa, Pakistan*

#### \* Corresponding authors E-mail addresses:

Corresponding author<sup>1</sup>: [ibrahim@gcuf.edu.pk](mailto:ibrahim@gcuf.edu.pk)

Corresponding author<sup>2</sup>: [usman.chemistry@gmail.com](mailto:usman.chemistry@gmail.com) ; [usmankhan@uo.edu.pk](mailto:usmankhan@uo.edu.pk)

**Table S1:** Bond length (Å) in optimized in NBDH, NMDH, and FBDH structures

| NBDH            |       | NMDH            |       | FBDH            |       |
|-----------------|-------|-----------------|-------|-----------------|-------|
| Bond Length (Å) |       | Bond Length (Å) |       | Bond Length (Å) |       |
| N(1)-C(2)       | 1.395 | C(1)-C(6)       | 1.439 | N(1)-C(2)       | 1.39  |
| N(1)-H(15)      | 1.017 | C(1)-C(10)      | 1.439 | N(1)-H(15)      | 1.017 |
| N(1)-N(39)      | 1.346 | C(2)-C(3)       | 1.377 | N(1)-N(39)      | 1.354 |
| C(2)-O(3)       | 1.207 | C(2)-H(27)      | 1.082 | C(2)-O(3)       | 1.209 |
| C(2)-C(4)       | 1.525 | C(3)-C(4)       | 1.416 | C(2)-C(4)       | 1.526 |
| C(4)-C(5)       | 1.532 | C(3)-H(28)      | 1.084 | C(4)-C(5)       | 1.532 |
| C(4)-H(16)      | 1.096 | C(4)-C(5)       | 1.374 | C(4)-H(16)      | 1.096 |
| C(4)-H(17)      | 1.098 | C(4)-H(29)      | 1.084 | C(4)-H(17)      | 1.098 |
| C(5)-C(6)       | 1.532 | C(5)-C(6)       | 1.423 | C(5)-C(6)       | 1.532 |
| C(5)-H(18)      | 1.096 | C(5)-H(30)      | 1.085 | C(5)-H(18)      | 1.096 |
| C(5)-H(19)      | 1.093 | C(6)-C(7)       | 1.42  | C(5)-H(19)      | 1.093 |
| C(6)-C(7)       | 1.533 | C(7)-C(8)       | 1.378 | C(6)-C(7)       | 1.533 |
| C(6)-H(20)      | 1.098 | C(7)-H(31)      | 1.085 | C(6)-H(20)      | 1.098 |
| C(6)-H(21)      | 1.098 | C(8)-C(9)       | 1.407 | C(6)-H(21)      | 1.098 |
| C(7)-C(8)       | 1.533 | C(8)-H(32)      | 1.084 | C(7)-C(8)       | 1.533 |
| C(7)-H(22)      | 1.097 | C(9)-C(10)      | 1.388 | C(7)-H(22)      | 1.098 |
| C(7)-H(23)      | 1.097 | C(9)-H(33)      | 1.083 | C(7)-H(23)      | 1.097 |
| C(8)-C(9)       | 1.533 | C(10)-C(11)     | 1.469 | C(8)-C(9)       | 1.533 |
| C(8)-H(24)      | 1.098 | C(11)-N(12)     | 1.298 | C(8)-H(24)      | 1.098 |
| C(8)-H(25)      | 1.098 | C(11)-H(34)     | 1.079 | C(8)-H(25)      | 1.098 |
| C(9)-C(10)      | 1.533 | N(12)-N(13)     | 1.419 | C(9)-C(10)      | 1.533 |
| C(9)-H(26)      | 1.098 | N(13)-C(14)     | 1.379 | C(9)-H(26)      | 1.098 |
| C(9)-H(27)      | 1.098 | N(13)-H(35)     | 1.013 | C(9)-H(27)      | 1.098 |
| C(10)-C(11)     | 1.533 | C(14)-O(15)     | 1.244 | C(10)-C(11)     | 1.533 |
| C(10)-H(28)     | 1.098 | C(14)-C(16)     | 1.534 | C(10)-H(28)     | 1.098 |
| C(10)-H(29)     | 1.098 | C(16)-C(17)     | 1.54  | C(10)-H(29)     | 1.098 |
| C(11)-C(12)     | 1.533 | C(16)-H(36)     | 1.097 | C(11)-C(12)     | 1.533 |
| C(11)-H(30)     | 1.098 | C(16)-H(37)     | 1.1   | C(11)-H(30)     | 1.098 |
| C(11)-H(31)     | 1.098 | C(17)-C(18)     | 1.542 | C(11)-H(31)     | 1.098 |
| C(12)-C(13)     | 1.533 | C(17)-H(38)     | 1.097 | C(12)-C(13)     | 1.533 |
| C(12)-H(32)     | 1.098 | C(17)-H(39)     | 1.095 | C(12)-H(32)     | 1.098 |
| C(12)-H(33)     | 1.098 | C(18)-C(19)     | 1.545 | C(12)-H(33)     | 1.098 |
| C(13)-C(14)     | 1.531 | C(18)-H(40)     | 1.099 | C(13)-C(14)     | 1.531 |
| C(13)-H(34)     | 1.097 | C(18)-H(41)     | 1.099 | C(13)-H(34)     | 1.097 |
| C(13)-H(35)     | 1.097 | C(19)-C(20)     | 1.544 | C(13)-H(35)     | 1.097 |
| C(14)-H(36)     | 1.095 | C(19)-H(42)     | 1.099 | C(14)-H(36)     | 1.095 |
| C(14)-H(37)     | 1.095 | C(19)-H(43)     | 1.099 | C(14)-H(37)     | 1.095 |
| C(14)-H(38)     | 1.093 | C(20)-C(21)     | 1.545 | C(14)-H(38)     | 1.093 |
| N(39)-C(40)     | 1.282 | C(20)-H(44)     | 1.099 | N(39)-C(40)     | 1.279 |
| C(40)-H(41)     | 1.088 | C(20)-H(45)     | 1.099 | C(40)-H(41)     | 1.099 |
| C(40)-C(42)     | 1.471 | C(21)-C(22)     | 1.545 | C(40)-C(42)     | 1.464 |
| C(42)-C(43)     | 1.408 | C(21)-H(46)     | 1.099 | C(42)-C(43)     | 1.405 |
| C(42)-C(44)     | 1.41  | C(21)-H(47)     | 1.099 | C(42)-C(44)     | 1.401 |
| C(43)-C(45)     | 1.385 | C(22)-C(23)     | 1.545 | C(43)-C(45)     | 1.387 |
| C(43)-H(46)     | 1.082 | C(22)-H(48)     | 1.099 | C(43)-H(46)     | 1.083 |
| C(44)-C(47)     | 1.395 | C(22)-H(49)     | 1.099 | C(44)-C(47)     | 1.392 |
| C(44)-N(52)     | 1.48  | C(23)-C(24)     | 1.544 | C(44)-H(48)     | 1.086 |
| C(45)-C(48)     | 1.397 | C(23)-H(50)     | 1.099 | C(45)-C(49)     | 1.397 |

|             |       |               |       |               |       |
|-------------|-------|---------------|-------|---------------|-------|
| C(45)-H(49) | 1.084 | C(23)-H(51)   | 1.099 | C(45)-H((50)) | 1.084 |
| C(47)-C(48) | 1.385 | C(24)-C(25)   | 1.545 | C(47)-C(49)   | 1.392 |
| C(47)-H(50) | 1.081 | C(24)-H(52)   | 1.099 | C(47)-H(51)   | 1.084 |
| C(48)-H(51) | 1.083 | C(24)-H(53)   | 1.099 | C(49)-H(52)   | 1.084 |
| N(52)-O(53) | 1.223 | C(25)-C(26)   | 1.544 |               |       |
| N(52)-O(54) | 1.228 | C(25)- H (54) | 1.098 |               |       |
|             |       | C(25)-H(55)   | 1.098 |               |       |
|             |       | C(26)-H(56)   | 1.096 |               |       |
|             |       | C(26)-H(57)   | 1.096 |               |       |

**Table S2:** Bond angle (°) in optimized in NBDH, NMDH, and FBDH structures.

| NBDH             |       | NMDH              |       | FBDH             |       |
|------------------|-------|-------------------|-------|------------------|-------|
| Bond angle (°)   |       | Bond angle (°)    |       | Bond angle (°)   |       |
| C(2)-N(1)-H(15)  | 119.3 | C(2)-C(1)-C(6)    | 118   | C(2)-N(1)-H(15)  | 119.1 |
| C(2)-N(1)-N(39)  | 121.2 | C(2)-C(1)-C(10)   | 123.6 | C(2)-N(1)-N(39)  | 121.5 |
| N(1)-C(2)-O(3)   | 122.9 | C(1)-C(2)-C(3)    | 121.1 | N(1)-C(2)-O(3)   | 123.3 |
| N(1)-C(2)-C(4)   | 113.1 | C(1)-C(2)-H(27)   | 119.8 | N(1)-C(2)-C(4)   | 113.2 |
| H(15)-N(1)-N(39) | 119.5 | C(6)-C(1)-C(10)   | 118.4 | H(15)-N(1)-N(39) | 119.4 |
| N(1)-N(39)-C(40) | 117.7 | C(1)-C(6)-C(5)    | 119.3 | N(1)-N(39)-C(40) | 117.7 |
| O(3)-C(2)-C(4)   | 124   | C(1)-C(6)-C(7)    | 119.6 | O(3)-C(2)-C(4)   | 123.5 |
| C(2)-C(4)-C(5)   | 112.5 | C(1)-C(10)-C(9)   | 119.6 | C(2)-C(4)-C(5)   | 112.3 |
| C(2)-C(4)-H(16)  | 110.6 | C(1)-C(10)-C(11)  | 120.6 | C(2)-C(4)-H(16)  | 111   |
| C(2)-C(4)-H(17)  | 106.8 | C(3)-C(2)-H(27)   | 119   | C(2)-C(4)-H(17)  | 106.8 |
| C(5)-C(4)-H(16)  | 110.6 | C(2)-C(3)-C(4)    | 120.7 | C(5)-C(4)-H(16)  | 110.6 |
| C(5)-C(4)-H(17)  | 109.7 | C(2)-C(3)-H(28)   | 119.8 | C(5)-C(4)-H(17)  | 109.5 |
| C(4)-C(5)-C(6)   | 113   | C(4)-C(3)-H(28)   | 119.5 | C(4)-C(5)-C(6)   | 113.1 |
| C(4)-5(H)-18(H)  | 109.1 | C(3)-C(4)-C(5)    | 119.9 | C(4)-C(5)-H(18)  | 109.1 |
| C(4)-C(5)-H(19)  | 108.4 | C(3)-C(4)-H(29)   | 119.7 | C(4)-C(5)-H(19)  | 108.2 |
| H(16)-C(4)-H(17) | 106.3 | C(5)-C(4)-H(29)   | 120.4 | H(16)-C(4)-H(17) | 106.5 |
| C(6)-C(5)-H(18)  | 109.7 | C(4)-C(5)-C(6)    | 121   | C(6)-C(5)-H(18)  | 109.7 |
| C(6)-C(5)-H(19)  | 110.3 | C(4)-C(5)-H(30)   | 120.6 | C(6)-C(5)-H(19)  | 110.3 |
| (C(5)-C(6)-C(7)  | 113.2 | C(6)-C(5)-H(30)   | 118.4 | C(5)-C(6)-C(7)   | 113.2 |
| C(5)-C(6)-H(20)  | 109.7 | C(5)-C(6)-C(7)    | 121.1 | C(5)-C(6)-H(20)  | 109.7 |
| C(5)-C(6)-H(21)  | 109.3 | C(6)-C(7)-C(8)    | 120.7 | C(5)-C(6)-H(21)  | 109.2 |
| H(18)-C(5)-H(19) | 106.1 | C(6)-C(7)-H(31)   | 118.6 | H(18)-C(5)-H(19) | 106.2 |
| C(7)-C(6)-H(20)  | 109.2 | C(8)-C(7)-H(31)   | 120.7 | C(7)-C(6)-H(20)  | 109.2 |
| C(7)-C(6)-H(21)  | 109.2 | C(7)-C(8)-C(9)    | 120.2 | C(7)-C(6)-H(21)  | 109.2 |
| C(6)-C(7)-C(8)   | 113.6 | C(7)-C(8)-H(32)   | 120.3 | C(6)-C(7)-C(8)   | 113.6 |
| C(6)-C(7)-H(22)  | 109.2 | C(9)-C(8)-H(32)   | 119.5 | C(6)-C(7)-H(22)  | 109.2 |
| C(6)-C(7)-H(23)  | 109.1 | C(8)-C(9)-C(10)   | 121.5 | C(6)-C(7)-H(23)  | 109.1 |
| H(20)-C(6)-H(21) | 106.1 | C(8)-C(9)-H(33)   | 120.6 | H(20)-C(6)-H(21) | 106.1 |
| C(8)-C(7)-H(22)  | 109.3 | C(10)-C(9)-H(33)  | 117.9 | C(8)-C(7)-H(22)  | 109.3 |
| C(8)-C(7)-H(23)  | 109.3 | C(9)-C(10)-C(11)  | 119.8 | C(8)-C(7)-H(23)  | 109.3 |
| C(7)-C(8)-C(9)   | 113.6 | C(10)-C(11)-N(12) | 119.3 | C(7)-C(8)-C(9)   | 113.6 |
| C(7)-C(8)-H(24)  | 109.3 | C(10)-C(11)-H(34) | 119.4 | C(7)-C(8)-H(24)  | 109.3 |
| C(7)-C(8)-H(25)  | 109.2 | N(12)-C(11)-H(34) | 121.4 | C(7)-C(8)-H(25)  | 109.2 |
| H(22)-C(7)-H(23) | 106   | C(11)-N(12)-N(13) | 118.8 | H(22)-C7-H(23)   | 106   |
| C(9)-C(8)-H(24)  | 109.2 | N(12)-N(13)-C(14) | 129.9 | C(9)-C(8)-H(24)  | 109.2 |
| C(9)-C(8)-H(25)  | 109.2 | N(12)-N(13)-H(35) | 110.8 | C(9)-C(8)-H(25)  | 109.2 |
| C(8)-C(9)-C(10)  | 113.6 | C(14)-N(13)-H(35) | 119.3 | C(8)-C(9)-C(10)  | 113.6 |

|                   |       |                   |       |                     |       |
|-------------------|-------|-------------------|-------|---------------------|-------|
| C(8)-C(9)-H(26)   | 109.2 | N(13)-C(14)-O(15) | 123.9 | C(8)-C(9)-H(26)     | 109.2 |
| C(8)-C(9)-H(27)   | 109.2 | N(13)-C(14)-C(16) | 113.3 | C(8)-C(9)-H(27)     | 109.2 |
| H(24)-C(8)-H(25)  | 106   | O(15)-C(14)-C(16) | 122.8 | H(24)-C8-H(25)      | 106   |
| C(10)-C(9)-H(26)  | 109.2 | C(14)-C(16)-C(17) | 110.9 | C(10)-C(9)-H(26)    | 109.2 |
| C(10)-C(9)-H(27)  | 109.2 | C(14)-C(16)-H(36) | 110.3 | C(10)-C(9)-H(27)    | 109.2 |
| C(9)-C(10)-C(11)  | 113.6 | C(14)-C(16)-H(37) | 107.9 | C(9)-C(10)-C(11)    | 113.6 |
| C(9)-C(10)-H(28)  | 109.2 | C(17)-C(16)-H(36) | 110.8 | C(9)-C(10)-H(28)    | 109.2 |
| C(9)-C(10)-H(29)  | 109.2 | C(17)-C(16)-H(37) | 109.4 | C(9)-C(10)-H(29)    | 109.2 |
| H(26)-C(9)-H(27)  | 106   | C(16)-C(17)-C(18) | 112.5 | H(26)-C(9)-H(27)    | 106   |
| C(11)-C(10)-H(28) | 109.2 | C(16)-C(17)-H(38) | 109.1 | C(11)-C10-H(28)     | 109.2 |
| C(11)-C(10)-H(29) | 109.2 | C(16)-C(17)-H(39) | 108.1 | C(11)-C10-H(29)     | 109.2 |
| C(10)-C(11)-C(12) | 113.6 | H(36)-C(16)-H(37) | 107.5 | C10-C(11)-C(12)     | 113.7 |
| C(10)-C(11)-H(30) | 109.2 | C(18)-C(17)-H(38) | 109.6 | C10-C(11)-H((30)    | 109.2 |
| C(10)-C(11)-H(31) | 109.2 | C(18)-C(17)-H(39) | 110.5 | C10-C(11)-H(31)     | 109.2 |
| H(28)-C(10)-H(29) | 106   | C(17)-C(18)-C(19) | 112.3 | H(28)-C10-H(29)     | 106   |
| C(12)-C(11)-H(30) | 109.2 | C(17)-C(18)-H(40) | 109.7 | C(12)-C(11)-H((30)  | 109.2 |
| C(12)-C(11)-H(31) | 109.2 | C(17)-C(18)-H(41) | 109.3 | C(12)-C(11)-H(31)   | 109.2 |
| C(11)-C(12)-C(13) | 113.7 | H(38)-C(17)-H(39) | 106.9 | C(11)-C(12)-C(13)   | 113.7 |
| C(11)-C(12)-H(32) | 109.3 | C(19)-C(18)-H(40) | 109.1 | C(11)-C(12)-H((32)  | 109.3 |
| C(11)-C(12)-H(33) | 109.3 | C(19)-C(18)-H(41) | 109.1 | C(11)-C(12)-H(33)   | 109.3 |
| H(30)-C(11)-H(31) | 106   | C(18)-C(19)-C(20) | 112.7 | H((30))-C(11)-H(31) | 106   |
| C(13)-C(12)-H(32) | 109.2 | C(18)-C(19)-H(42) | 109.2 | C(13)-C(12)-H((32)  | 109.2 |
| C(13)-C(12)-H(33) | 109.2 | C(18)-C(19)-H(43) | 109.1 | C(13)-C(12)-H(33)   | 109.2 |
| C(12)-C(13)-C(14) | 113.3 | H(40)-C(18)-H(41) | 107.2 | C(12)-C(13)-C(14)   | 113.3 |
| C(12)-C(13)-H(34) | 109.2 | C(20)-C(19)-H(42) | 109.2 | C(12)-C(13)-H(34)   | 109.2 |
| C(12)-C(13)-H(35) | 109.2 | C(20)-C(19)-H(43) | 109.3 | C(12)-C(13)-H(35)   | 109.2 |
| H(32)-C(12)-H(33) | 106   | C(19)-C(20)-C(21) | 112.7 | H((32)-C(12)-H(33)  | 106   |
| C(14)-C(13)-H(34) | 109.4 | C(19)-C(20)-H(44) | 109.2 | C(14)-C(13)-H(34)   | 109.4 |
| C(14)-C(13)-H(35) | 109.4 | C(19)-C(20)-H(45) | 109.2 | C(14)-C(13)-3H5     | 109.4 |
| C(13)-C(14)-H(36) | 111.2 | H(42)-C(19)-H(43) | 107.2 | C(13)-C(14)-H(36)   | 111.2 |
| C(13)-C(14)-H(37) | 111.2 | C(21)-C(20)-H(44) | 109.2 | C(13)-C(14)-H(37)   | 111.2 |
| C(13)-C(14)-H(38) | 111.5 | C(21)-C(20)-H(45) | 109.2 | C(13)-C(14)-H(38)   | 111.5 |
| H(34)-C(13)-H(35) | 106   | C(20)-C(21)-C(22) | 112.7 | H(34)-C(13)-H(35)   | 106   |
| H(36)-C(14)-H(37) | 107.5 | C(20)-C(21)-H(46) | 109.2 | H(36)-C(14)-H(37)   | 107.5 |
| H(36)-C(14)-H(38) | 107.6 | C(20)-(21)-H(47)  | 109.2 | H(36)-C(14)-H(38)   | 107.6 |
| H(37)-C(14)-H(38) | 107.7 | H(44)-C(20)-H(45) | 107.2 | H(37)-C(14)-H(38)   | 107.6 |
| N(39)-C(40)-H(41) | 122.1 | C(22)-C(21)-H(46) | 109.2 | N(39)-C(40)-H(41)   | 121.4 |
| N(39)-C(40)-C(42) | 119.2 | C(22)-C(21)-H(47) | 109.2 | N(39)-C(40)-C(42)   | 121.9 |
| H(41)-C(40)-C(42) | 118.7 | C(21)-C(22)-C(23) | 112.7 | H(41)-C(40)-C(42)   | 116.6 |
| C(40)-C(42)-C(43) | 118.8 | C(21)-C(22)-H(48) | 109.2 | C(40)-C(42)-C(43)   | 121.6 |
| C(40)-C(42)-C(44) | 124.8 | C(21)-C(22)-H(49) | 109.2 | C(40)-C(42)-C(44)   | 119.4 |
| C(43)-C(42)-C(44) | 116.4 | H(46)-C(21)-H(47) | 107.2 | C(43)-C(42)-C(44)   | 119   |
| C(42)-C(43)-C(45) | 121.8 | C(23)-C(22)-H(48) | 109.2 | C(42)-C(43)-C(45)   | 120.2 |
| C(42)-C(43)-H(46) | 117.4 | C(23)-C(22)-H(49) | 109.2 | C(42)C-(43)-H(46)   | 118.8 |
| C(42)-C(44)-C(47) | 122.1 | C(22)-C(23)-C(24) | 112.7 | C(42)-C(44)-C(47)   | 120.6 |
| C(42)-C(44)-N(52) | 122.5 | C(22)-C(23)-H(50) | 109.2 | C(42)-C(44)-H(48)   | 119.6 |
| C(45)-C(43)-H(46) | 120.8 | C(22)-C(23)-H(51) | 109.2 | C(45)-C(43)-H(46)   | 121.1 |
| C(43)-C(45)-C(48) | 120.4 | H(48)-C(22)-H(49) | 107.2 | C(43)-C(45)-C(49)   | 120.4 |
| C(43)-C(45)-H(49) | 119.5 | C(24)-C(23)-H(50) | 109.2 | C(43)-C(45)-H((50)  | 119.7 |
| C(47)-C(44)-N(52) | 115.4 | C(24)-C(23)-H(51) | 109.2 | C(47)-C(44)-H(48)   | 119.8 |
| C(44)-C(47)-C(48) | 119.9 | C(23)-C(24)-C(25) | 112.8 | C(44)-C(47)-C(49)   | 120   |

|                   |       |                   |       |                    |       |
|-------------------|-------|-------------------|-------|--------------------|-------|
| C(44)-C(47)-H(50) | 118.5 | C(23)-C(24)-H(52) | 109.2 | C(44)-C(47)-H(51)  | 119.9 |
| C(44)-N(52)-O(53) | 117.4 | C(23)-C(24)-H(53) | 109.2 | C(49)-C(45)-H((50) | 119.9 |
| C(44)-N(52)-O(54) | 118.4 | H(50)-C(23)H-(51) | 107.2 | C(45)-C(49)-C(47)  | 119.8 |
| C(48)-C(45)-H(49) | 120.1 | C(25)-C(24)-H(52) | 109.1 | C(45)-C(49)-H(52)  | 120.1 |
| C(45)-C(48)-C(47) | 119.4 | C(25)-C(24)-H(53) | 109.1 | C(49)-C(47)-H(51)  | 120.2 |
| C(45)-C(48)-H(51) | 120.7 | C(24)-C(25)-C(26) | 112.3 | C(47)-C(49)-H(52)  | 120.1 |
| C(48)-C(47)-H(50) | 121.6 | C(24)-C(25)-H(54) | 109.1 |                    |       |
| C(47)-C(48)-H(51) | 119.9 | C(24)-C(25)H-(55) | 109.1 |                    |       |
| O(53)-N(52)-O(54) | 124.1 | H(52)-C(24)-H(53) | 107.1 |                    |       |
|                   |       | C(26)-C(25)-H(54) | 109.6 |                    |       |
|                   |       | C(26)-C(25)-H(55) | 109.6 |                    |       |
|                   |       | C(25)-C(26)-H(56) | 110.5 |                    |       |
|                   |       | C(25)-C(26)-H(57) | 110.5 |                    |       |
|                   |       | C(25)-C(26)-H(58) | 111.2 |                    |       |
|                   |       | H(54)-C(25)-H(55) | 107.1 |                    |       |
|                   |       | H(56)-C(26)-H(57) | 108.1 |                    |       |
|                   |       | H(56)-C(26)-H(58) | 108.2 |                    |       |
|                   |       | H(57)-C(26)-H(58) | 108.2 |                    |       |

**Table S3:** Natural bond orbital (NBO) analysis of NBDH, NMDH and FBDH

| Molecules   | Donor (i)  | Type      | Acceptor (j) | Type       | E(2) <sup>a</sup> | E(j)-E(i) <sup>b</sup><br>[a.u.] | F(i; j) <sup>c</sup><br>[a.u.] |
|-------------|------------|-----------|--------------|------------|-------------------|----------------------------------|--------------------------------|
| <b>NBDH</b> | C 4 - H17  | $\sigma$  | C2 - O3      | $\pi^*$    | 6.34              | 0.53                             | 0.054                          |
|             | N39 - C40  | $\pi$     | C42 - C44    | $\pi^*$    | 10.84             | 0.35                             | 0.06                           |
|             | C42 - C43  | $\sigma$  | C44 - N52    | $\sigma^*$ | 5.52              | 0.96                             | 0.066                          |
|             | C42 - C44  | $\sigma$  | C44 - C47    | $\sigma^*$ | 5.05              | 1.27                             | 0.072                          |
|             | C42 - C44  | $\pi$     | N39 - C40    | $\pi^*$    | 13.58             | 0.28                             | 0.058                          |
|             | C42 - C44  | $\pi$     | C43 - C45    | $\pi^*$    | 15.93             | 0.3                              | 0.064                          |
|             | C42 - C44  | $\pi$     | C47 - C48    | $\pi^*$    | 20.22             | 0.3                              | 0.071                          |
|             | C42 - C 44 | $\pi$     | N52 - O53    | $\pi^*$    | 23.69             | 0.15                             | 0.056                          |
|             | C43 - C45  | $\pi$     | C42 - C44    | $\pi^*$    | 21.68             | 0.27                             | 0.07                           |
|             | C43 - C45  | $\pi$     | C47 - C48    | $\pi^*$    | 18.99             | 0.28                             | 0.066                          |
|             | C44 - C47  | $\sigma$  | C42 - C44    | $\sigma^*$ | 5.6               | 1.26                             | 0.075                          |
|             | C47 - C48  | $\pi$     | C42 - C44    | $\pi^*$    | 19.86             | 0.28                             | 0.068                          |
|             | C47 - C48  | $\pi$     | C43 - C45    | $\pi^*$    | 19.29             | 0.29                             | 0.068                          |
|             | C47 - H50  | $\sigma$  | C42 - C44    | $\sigma^*$ | 5.37              | 1.06                             | 0.068                          |
|             | N52 - O53  | $\pi$     | N52 - O53    | $\pi^*$    | 7.14              | 0.33                             | 0.052                          |
|             | N1         | LP(1)     | C2 - O3      | $\pi^*$    | 46.24             | 0.31                             | 0.11                           |
|             | N1         | LP(1)     | N39 - C40    | $\pi^*$    | 30.98             | 0.28                             | 0.087                          |
|             | O3         | LP(2)     | N1 - C2      | $\sigma^*$ | 29.41             | 0.66                             | 0.127                          |
|             | O3         | LP(2)     | C2 - C4      | $\sigma^*$ | 19.92             | 0.62                             | 0.102                          |
|             | N39        | LP(1)     | N1 - H15     | $\sigma^*$ | 8.37              | 0.76                             | 0.072                          |
| N39         | LP(1)      | C40 - H41 | $\sigma^*$   | 8.86       | 0.8               | 0.076                            |                                |
| O53         | LP (2)     | C44 - N52 | $\sigma^*$   | 13.73      | 0.56              | 0.078                            |                                |

|                     |          |            |            |            |        |       |       |
|---------------------|----------|------------|------------|------------|--------|-------|-------|
| <b>NMDH</b>         | O53      | LP (2)     | N52 - O54  | $\sigma^*$ | 18.94  | 0.71  | 0.104 |
|                     | O54      | LP (2)     | C44 - N52  | $\sigma^*$ | 12.28  | 0.56  | 0.074 |
|                     | O54      | LP (2)     | N52 - O53  | $\sigma^*$ | 18.71  | 0.72  | 0.105 |
|                     | O54      | LP (3)     | N52 - O53  | $\pi^*$    | 160.86 | 0.15  | 0.143 |
|                     | O54      | LP (3)     | N52 - O54  | $\sigma^*$ | 7.77   | 0.7   | 0.075 |
|                     | C1-C6    | $\pi$      | C2-C3      | $\pi^*$    | 16.63  | 0.28  | 0.064 |
|                     | C1-C6    | $\pi$      | C4-C5      | $\pi^*$    | 16.62  | 0.28  | 0.064 |
|                     | C1-C6    | $\pi$      | C7-C8      | $\pi^*$    | 17.18  | 0.27  | 0.065 |
|                     | C1-C6    | $\pi$      | C9-C10     | $\pi^*$    | 16.47  | 0.28  | 0.063 |
|                     | C2-C3    | $\pi$      | C1-C6      | $\pi^*$    | 16.42  | 0.29  | 0.065 |
|                     | C2-C3    | $\pi$      | C4-C5      | $\pi^*$    | 17.43  | 0.3   | 0.064 |
|                     | C4-C5    | $\pi$      | C1-C6      | $\pi^*$    | 16.35  | 0.29  | 0.065 |
|                     | C4-C5    | $\pi$      | C2-C3      | $\pi^*$    | 17.84  | 0.3   | 0.065 |
|                     | C7-C8    | $\pi$      | C1-C6      | $\pi^*$    | 16.67  | 0.29  | 0.065 |
|                     | C7-C8    | $\pi$      | C9-C10     | $\pi^*$    | 19.09  | 0.3   | 0.068 |
|                     | C9-C10   | $\pi$      | C1-C6      | $\pi^*$    | 17.09  | 0.29  | 0.065 |
|                     | C9-C10   | $\pi$      | C7-C8      | $\pi^*$    | 17.66  | 0.29  | 0.065 |
|                     | C9-C10   | $\pi$      | C11 - N12  | $\pi^*$    | 16.36  | 0.27  | 0.061 |
|                     | C10-C12  | $\sigma$   | N12-N13    | $\sigma^*$ | 5.24   | 1.02  | 0.065 |
|                     | C11-N12  | $\pi$      | C9 - C10   | $\pi^*$    | 7.57   | 0.37  | 0.051 |
|                     | C14-C16  | $\sigma$   | N12-N13    | $\sigma^*$ | 5.26   | 1     | 0.065 |
|                     | C16-H37  | $\sigma$   | C14-O15    | $\pi^*$    | 6.06   | 0.52  | 0.053 |
|                     | N12      | LP (1)     | C11 - H34  | $\sigma^*$ | 8.55   | 0.83  | 0.076 |
|                     | N12      | LP (1)     | N13 - C14  | $\sigma^*$ | 11.4   | 0.82  | 0.087 |
|                     | N13      | LP (1)     | C11 - N12  | $\pi^*$    | 27.34  | 0.29  | 0.083 |
|                     | N13      | LP (1)     | C14 - O15  | $\pi^*$    | 56.87  | 0.29  | 0.117 |
|                     | O15      | LP (2)     | N13 - C14  | $\sigma^*$ | 25.24  | 0.7   | 0.12  |
|                     | O15      | LP (2)     | C14 - C16  | $\sigma^*$ | 18.8   | 0.63  | 0.099 |
|                     | C4-H17   | $\pi$      | C2 - O3    | $\pi^*$    | 6      | 0.54  | 0.053 |
|                     | C42-C44  | $\pi$      | N39-C40    | $\pi^*$    | 18.96  | 0.26  | 0.066 |
|                     | C42-C44  | $\pi$      | C43-C45    | $\pi^*$    | 18.63  | 0.29  | 0.067 |
|                     | C42-C44  | $\pi$      | C47-C49    | $\pi^*$    | 19.99  | 0.28  | 0.068 |
|                     | C43-C45  | $\pi$      | C42-C44    | $\pi^*$    | 20.1   | 0.28  | 0.068 |
| C43-C45             | $\pi$    | C47-C49    | $\pi^*$    | 20.94      | 0.28   | 0.069 |       |
| C47-C49             | $\pi$    | C42-C44    | $\pi^*$    | 20.58      | 0.28   | 0.069 |       |
| <b>FBDH</b> C47-C49 | $\pi$    | C43-C45    | $\pi^*$    | 18.75      | 0.29   | 0.067 |       |
| N 1                 | LP (1)   | C2-O3      | $\pi^*$    | 47.17      | 0.31   | 0.111 |       |
| N1                  | LP(1)    | N39-C40    | $\pi^*$    | 29.03      | 0.29   | 0.084 |       |
| O3                  | LP(2)    | N1-C2      | $\sigma^*$ | 28.81      | 0.67   | 0.126 |       |
| O3                  | LP(2)    | C2-C4      | $\sigma^*$ | 20.05      | 0.62   | 0.102 |       |
| N39                 | LP(1)    | C40-C41    | $\sigma^*$ | 10.13      | 0.76   | 0.079 |       |
| C 49 - F52          | $\sigma$ | C 43 - C45 | $\sigma^*$ | 1.35       | 1.75   | 0.043 |       |
| C49 - F 52          | $\sigma$ | C 44 - C47 | $\sigma^*$ | 1.4        | 1.73   | 0.044 |       |

<sup>a</sup>E<sup>(2)</sup> means energy of hyper conjugative interaction (stabilization energy in kcal/mol).

<sup>b</sup>Energy difference between donor and acceptor *i* and *j* NBO orbitals.

<sup>c</sup>F(*i*; *j*) is the Fock matrix element between *i* and *j* NBO orbitals

**Table S4:** Vibrational frequencies of NBDH with proposed assignments

| frequency<br>(cm <sup>-1</sup> )<br>(Theo)<br>Unscaled | frequency<br>(cm <sup>-1</sup> )<br>(Theo)<br>Scaled | <i>I</i> <sub>IR</sub> | Vibrational assignments                                                                  |
|--------------------------------------------------------|------------------------------------------------------|------------------------|------------------------------------------------------------------------------------------|
| 3489.05                                                | 3370.42                                              | 4.1626                 | <i>ν</i> N-H <sub>DH</sub>                                                               |
| 3224.67                                                | 3115.03                                              | 1.7179                 | <i>ν</i> (s) C-H <sub>Ben</sub>                                                          |
| 3208.35                                                | 3099.27                                              | 3.3055                 | <i>ν</i> (s) C-H <sub>Ben</sub>                                                          |
| 3193.76                                                | 3085.17                                              | 9.4475                 | <i>ν</i> (as) C-H <sub>Ben</sub> + <i>ν</i> (s) C-H <sub>Ben</sub>                       |
| 3177.47                                                | 3069.44                                              | 3.2634                 | <i>ν</i> (as) H-C=C-H <sub>Ben</sub>                                                     |
| 3127.52                                                | 3021.18                                              | 30.9424                | <i>ν</i> C-H <sub>DH</sub>                                                               |
| 3084.10                                                | 2979.24                                              | 48.1115                | <i>ν</i> (as) C-H <sub>Meth</sub>                                                        |
| 3082.00                                                | 2977.21                                              | 48.8813                | <i>ν</i> (as) C-H <sub>Eth</sub>                                                         |
| 3079.35                                                | 2974.65                                              | 77.1880                | <i>ν</i> (as) C-H <sub>Eth</sub> + <i>ν</i> (as) C-H <sub>Meth</sub>                     |
| 3041.59                                                | 2938.18                                              | 14.3644                | <i>ν</i> (as) C-H <sub>Eth</sub> + <i>ν</i> (s) C-H <sub>Eth</sub>                       |
| 908.23                                                 | 877.35                                               | 3.1942                 | <i>ν</i> (τ) C-H <sub>Ben</sub>                                                          |
| 908.23                                                 | 877.35                                               | 0.3660                 | <i>ν</i> (w) C-H <sub>Ben</sub>                                                          |
| 881.28                                                 | 851.32                                               | 9.5792                 | <i>ν</i> (τ) C-H <sub>Eth</sub>                                                          |
| 853.63                                                 | 824.61                                               | 19.0694                | <i>ν</i> (δ) N=O + <i>ν</i> (s) C=C-C=C-C <sub>Ben</sub>                                 |
| 826.85                                                 | 798.74                                               | 0.3875                 | <i>ν</i> (ρ) C-H <sub>Eth</sub>                                                          |
| 762.53                                                 | 736.60                                               | 30.6766                | <i>ν</i> (w) C-H <sub>Ben</sub>                                                          |
| 708.11                                                 | 684.03                                               | 17.9713                | <i>ν</i> (δ) C-H <sub>Ben</sub> + <i>ν</i> (δ) N=O + <i>ν</i> (s) C-C=C-C <sub>Ben</sub> |
| 649.87                                                 | 627.77                                               | 7.1000                 | <i>ν</i> (s) C=C-C=C-C <sub>Ben</sub>                                                    |

*ν*, stretching; δ, scissoring; ρ, rocking; w, wagging; s, symmetric; as, asymmetric; τ, twisting; Ben, benzene ring; Meth, methyl group; DH, Dodecanehydrazide; Eth, ethyl group; Exp, experimental; Theo, theoretical

**Table S5:** Vibrational frequencies of NMDH with proposed assignments

| frequency<br>(cm <sup>-1</sup> )<br>(Theo)<br>Unscaled | frequency<br>(cm <sup>-1</sup> )<br>(Theo)<br>Scaled | <i>I</i> <sub>IR</sub> | Vibrational assignments           |
|--------------------------------------------------------|------------------------------------------------------|------------------------|-----------------------------------|
| 3486.67                                                | 3368.12                                              | 8.0552                 | <i>ν</i> N-H <sub>DH</sub>        |
| 3199.97                                                | 3091.17                                              | 2.1249                 | <i>ν</i> (s) C-H <sub>Ben</sub>   |
| 3198.75                                                | 3089.99                                              | 19.3163                | <i>ν</i> (s) C-H <sub>Ben</sub>   |
| 3184.94                                                | 3076.65                                              | 37.4448                | <i>ν</i> (as) C-H <sub>Ben</sub>  |
| 3163.01                                                | 3055.47                                              | 1.5980                 | <i>ν</i> (as) C-H <sub>Ben</sub>  |
| 3083.93                                                | 2979.08                                              | 48.3591                | <i>ν</i> (as) C-H <sub>Meth</sub> |
| 3081.83                                                | 2977.05                                              | 49.0545                | <i>ν</i> (as) C-H <sub>Eth</sub>  |
| 3049.85                                                | 2946.16                                              | 41.4160                | <i>ν</i> C-H <sub>DH</sub>        |

|         |         |         |                                                                                     |
|---------|---------|---------|-------------------------------------------------------------------------------------|
| 3024.17 | 2921.35 | 36.1823 | $\nu$ (s) C-H <sub>Eth</sub>                                                        |
| 3018.39 | 2915.76 | 53.5408 | $\nu$ (s) C-H <sub>Meth</sub>                                                       |
| 732.61  | 707.70  | 4.9204  | $\nu$ ( $\rho$ ) C-H <sub>Ben</sub>                                                 |
| 661.65  | 639.15  | 14.8127 | $\nu$ (as) C-C=C-C=C-C=C-C-C <sub>Ben</sub>                                         |
| 654.61  | 632.35  | 0.1614  | $\nu$ ( $\tau$ ) C-H <sub>Ben</sub> + $\nu$ (as) C-C=C-C=C-C=C-C=C-C <sub>Ben</sub> |
| 622.50  | 601.34  | 4.0741  | $\nu$ ( $\rho$ ) C-H <sub>Eth</sub>                                                 |
| 562.42  | 543.30  | 1.6392  | $\nu$ (w) C-H <sub>Ben</sub> + $\nu$ (s) C-C=C-C=C-C=C-C=C-C <sub>Ben</sub>         |
| 546.69  | 528.10  | 3.6126  | $\nu$ (as) C-C=C-C=C-C=C-C=C-C <sub>Ben</sub>                                       |

$\nu$ , stretching;  $\delta$ , scissoring;  $\rho$ , rocking; w, wagging; s, symmetric; as, asymmetric;  $\tau$ , twisting; Ben, benzene ring; Meth, methyl group; DH, Dodecanehydrazide; Eth, ethyl group; Exp, experimental; Theo, theoretical

**Table S6:** Vibrational frequencies of FBDH with proposed assignments

| frequency<br>(cm <sup>-1</sup> )<br>(Theo)<br>Unscaled | frequency<br>(cm <sup>-1</sup> )<br>(Theo)<br>Scaled | $I_{IR}$ | Vibrational assignments                                        |
|--------------------------------------------------------|------------------------------------------------------|----------|----------------------------------------------------------------|
| 3491.28                                                | 3372.58                                              | 7.1366   | $\nu$ N-H <sub>DH</sub>                                        |
| 3205.95                                                | 3096.95                                              | 3.4373   | $\nu$ (s) C-H <sub>Ben</sub>                                   |
| 3201.42                                                | 3092.57                                              | 5.1257   | $\nu$ C-H <sub>Ben</sub>                                       |
| 3193.01                                                | 3084.45                                              | 1.7980   | $\nu$ (as) C-H <sub>Ben</sub>                                  |
| 3084.01                                                | 2979.15                                              | 48.1386  | $\nu$ (as) C-H <sub>Meth</sub>                                 |
| 3081.85                                                | 2977.07                                              | 48.9623  | $\nu$ (as) C-H <sub>Eth</sub>                                  |
| 3079.30                                                | 2974.60                                              | 77.2423  | $\nu$ (as) C-H <sub>Eth</sub> + $\nu$ (as) C-H <sub>Meth</sub> |
| 3055.12                                                | 2951.25                                              | 205.8827 | $\nu$ (as) C-H <sub>Eth</sub>                                  |
| 3041.88                                                | 2938.46                                              | 17.3727  | $\nu$ (s) C-H <sub>Eth</sub> + $\nu$ (as) C-H <sub>Eth</sub>   |
| 1028.15                                                | 993.19                                               | 2.5078   | $\nu$ (s) C=C-C=C-C <sub>Ben</sub>                             |
| 942.11                                                 | 910.08                                               | 4.8607   | $\nu$ ( $\tau$ ) C-H <sub>Ben</sub>                            |
| 938.42                                                 | 906.51                                               | 0.8676   | $\nu$ ( $\tau$ ) C-H <sub>Eth</sub>                            |
| 896.77                                                 | 866.28                                               | 1.5364   | $\nu$ (w) C-H <sub>Meth</sub>                                  |
| 880.68                                                 | 850.74                                               | 3.0374   | $\nu$ ( $\delta$ ) C-H <sub>Eth</sub>                          |
| 827.11                                                 | 798.99                                               | 6.9598   | $\nu$ (w) C-H <sub>Ben</sub>                                   |
| 804.57                                                 | 777.21                                               | 17.0773  | $\nu$ (s) C=C-C=C-C <sub>Ben</sub> + $\nu$ C-F <sub>Ben</sub>  |
| 732.25                                                 | 707.35                                               | 5.2830   | $\nu$ ( $\rho$ ) C-H <sub>Eth</sub>                            |
| 651.23                                                 | 629.09                                               | 2.7356   | $\nu$ (s) C=C-C=C-C <sub>Ben</sub>                             |
| 634.17                                                 | 612.61                                               | 16.6578  | $\nu$ ( $\rho$ ) C-H <sub>Eth</sub>                            |

$\nu$ , stretching;  $\delta$ , scissoring;  $\rho$ , rocking; w, wagging; s, symmetric; as, asymmetric;  $\tau$ , twisting; Ben, benzene ring; Meth, methyl group; DH, Dodecanehydrazide; Eth, ethyl group; Exp, experimental; Theo, theoretical



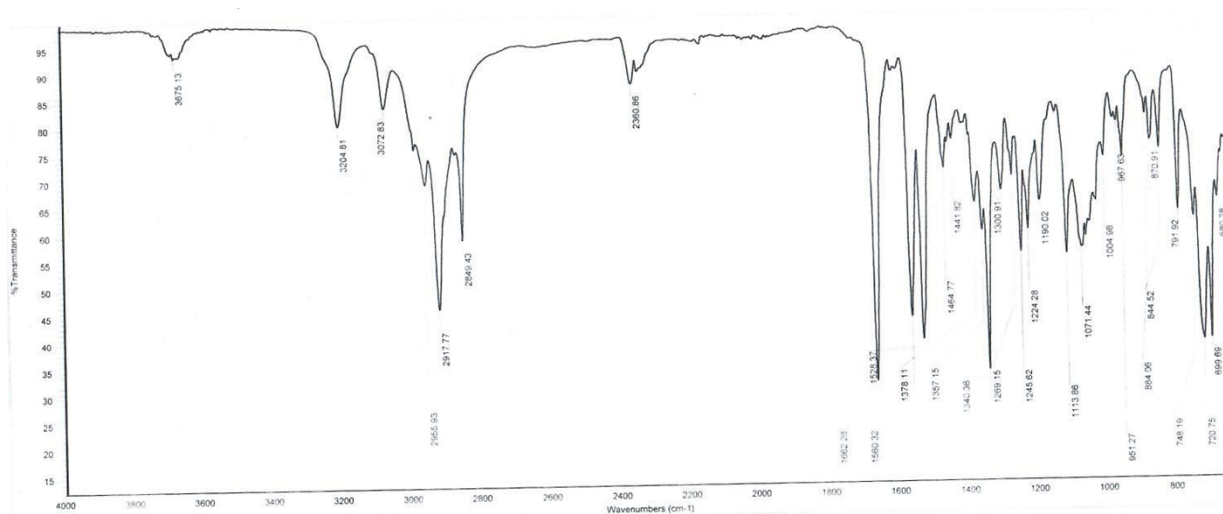

**Figure S1:** Experimental FTIR spectrum of NBDH

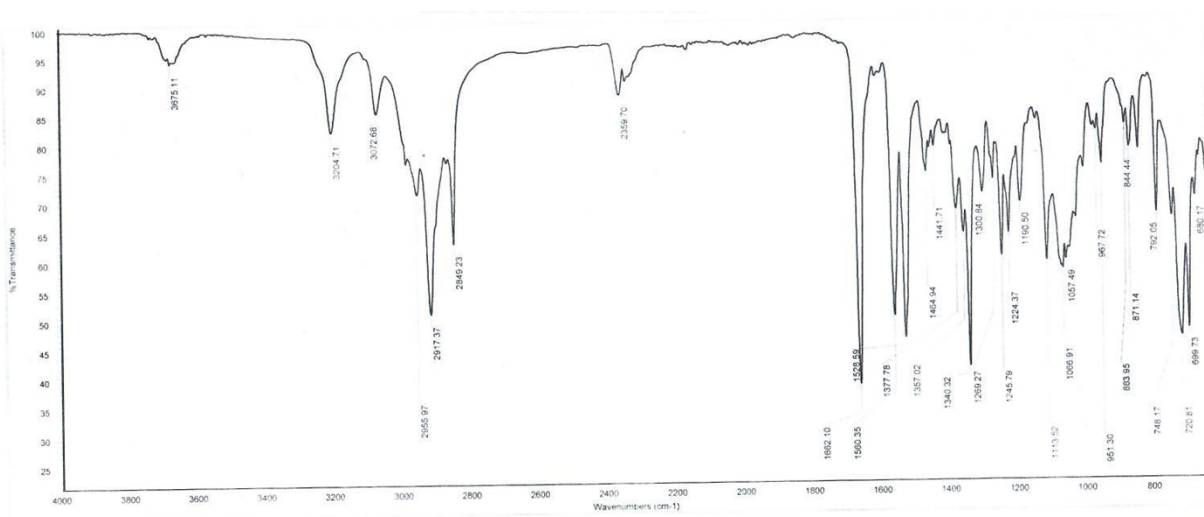

**Figure S2:** Experimental FTIR spectrum of NMDH

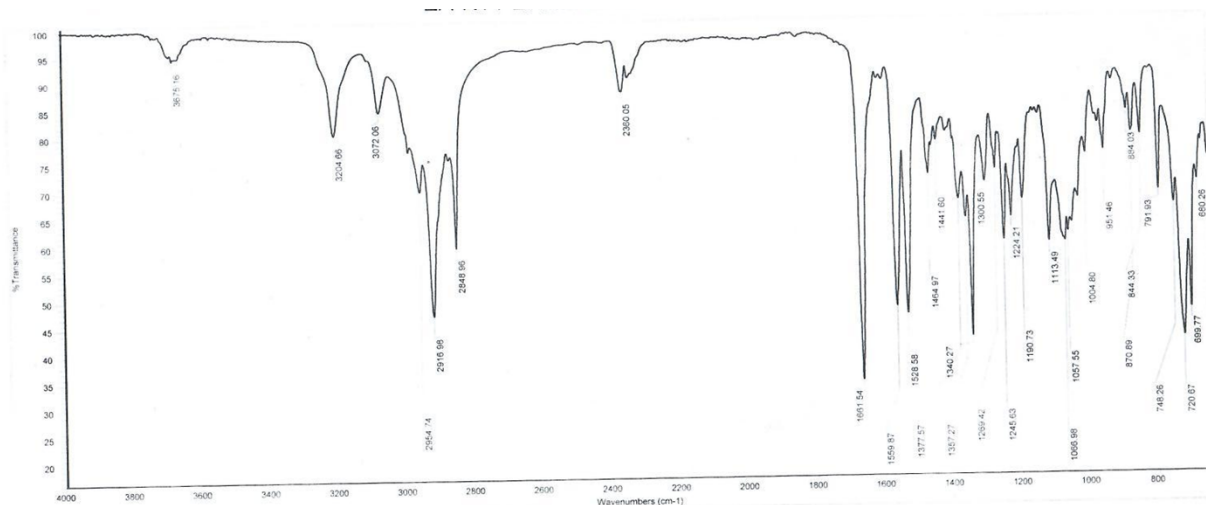

**Figure S3:** Experimental FTIR spectrum of FBDH

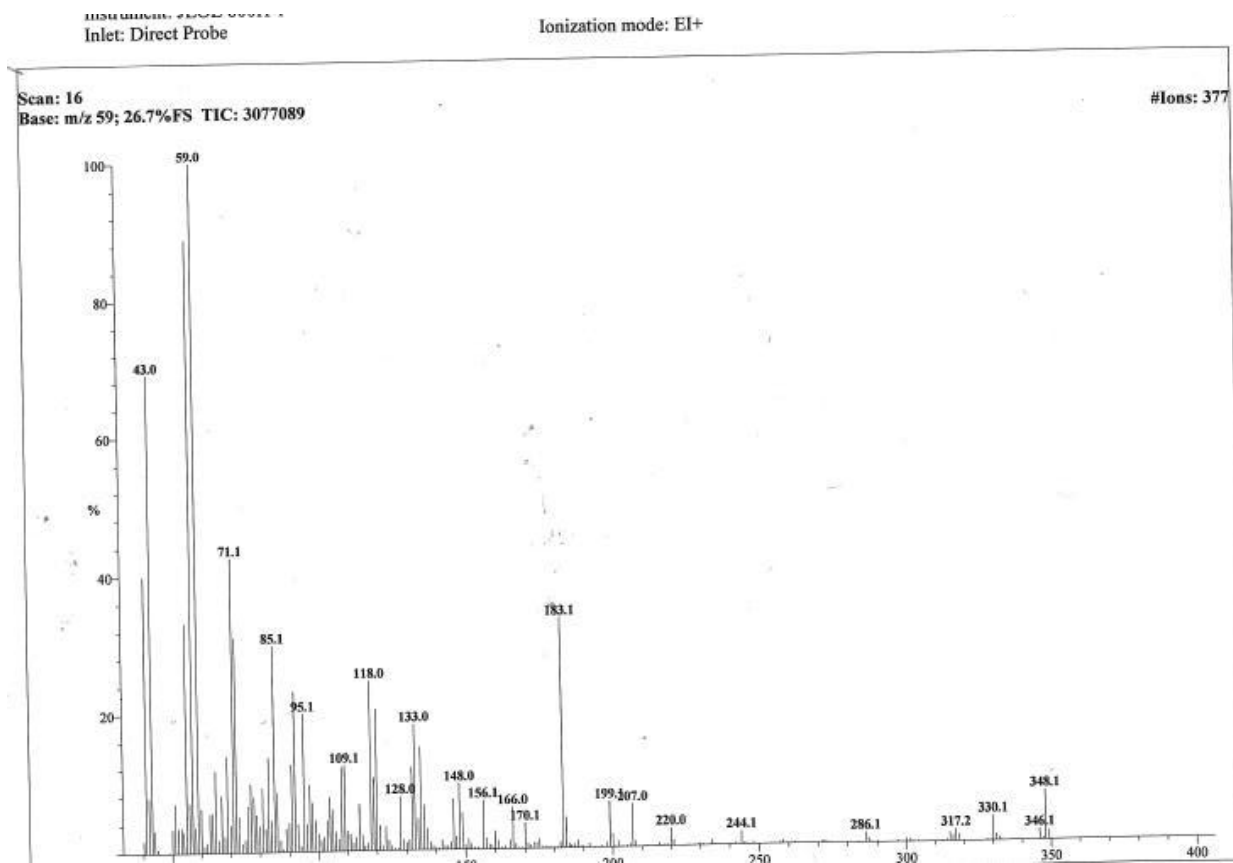

**Figure S4:** Experimental EI-MS spectrum of NBDH

Inlet: Direct Probe

Ionization mode: EI+

Scan: 18

Base: m/z 153; 99.9%FS TIC: 8464219

#Ions: 771

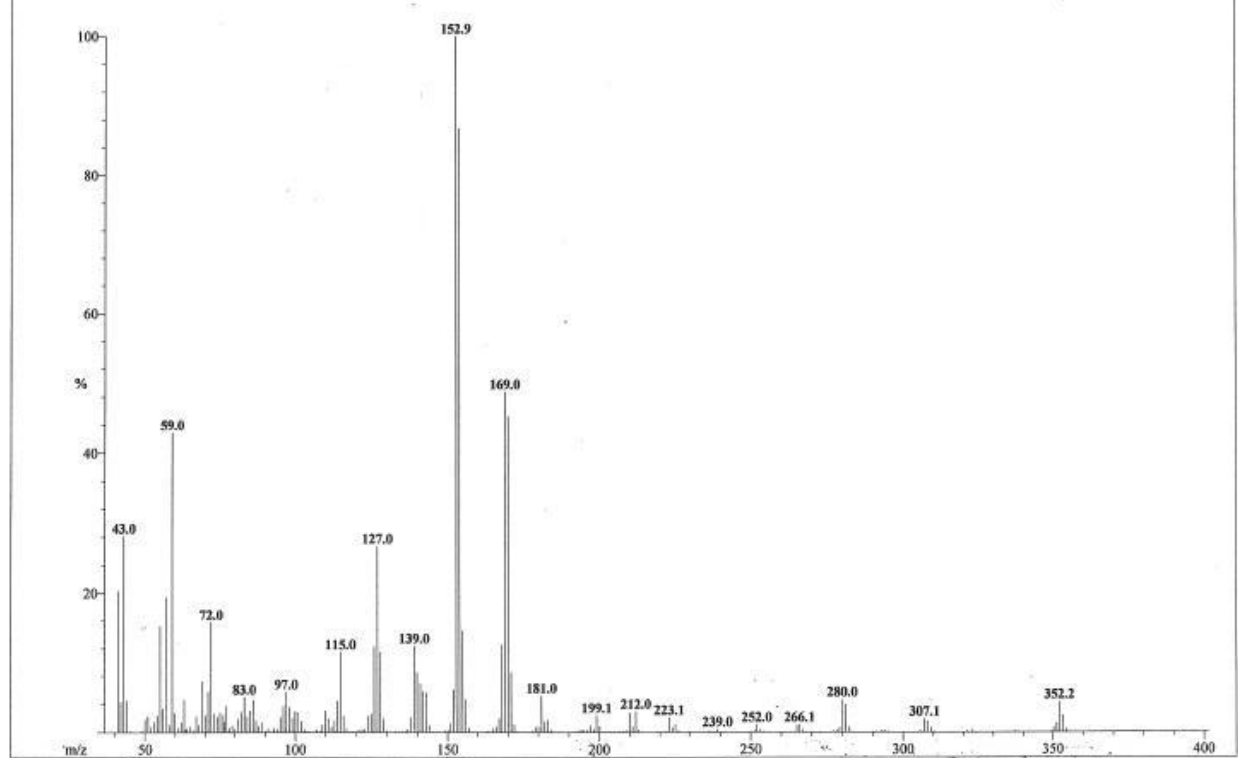

Figure S5: Experimental EI-MS spectrum of NMDH

Inlet: Direct Probe

Ionization mode: EI+

Scan: 14

Base: m/z 138; 91.1%FS TIC: 5468139

#Ions: 627

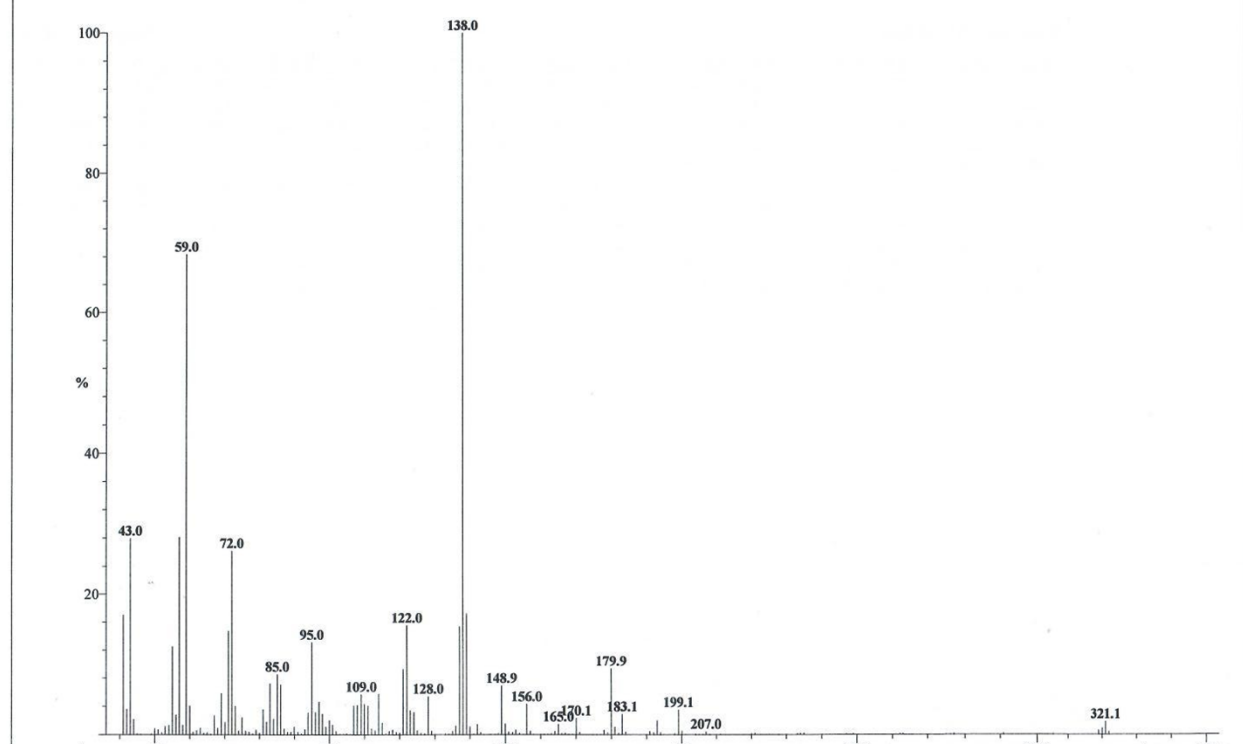

Figure S6: Experimental EI-MS spectrum of FBDH

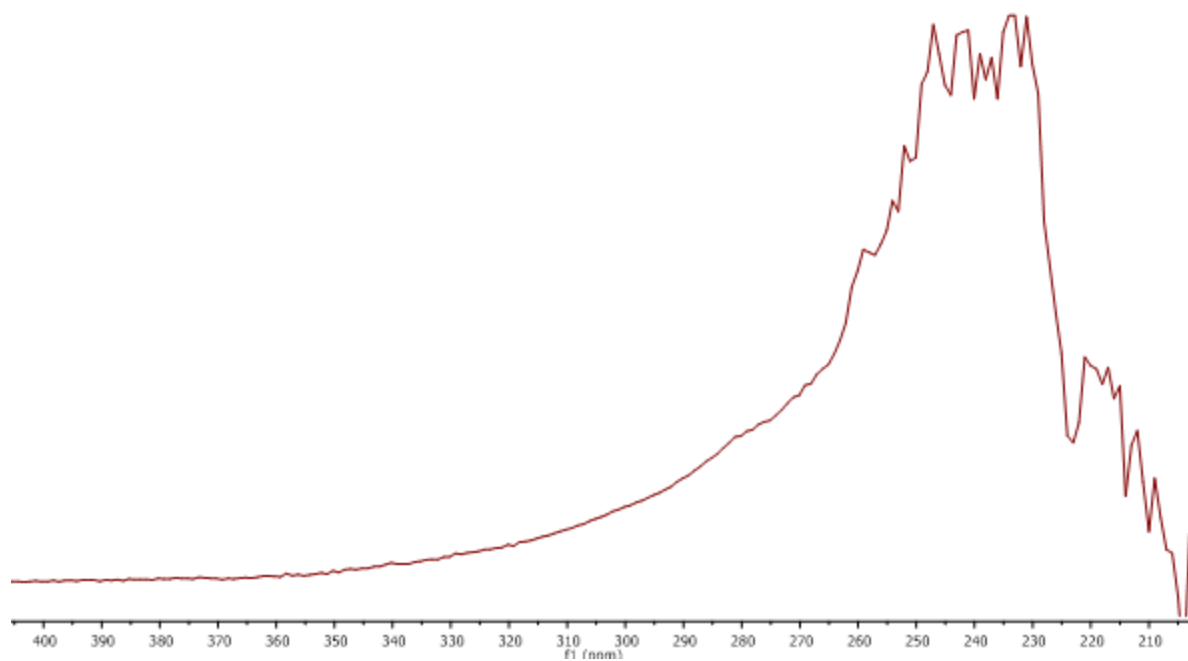

**Figure S7:** Experimental UV spectrum of the compound NBDH

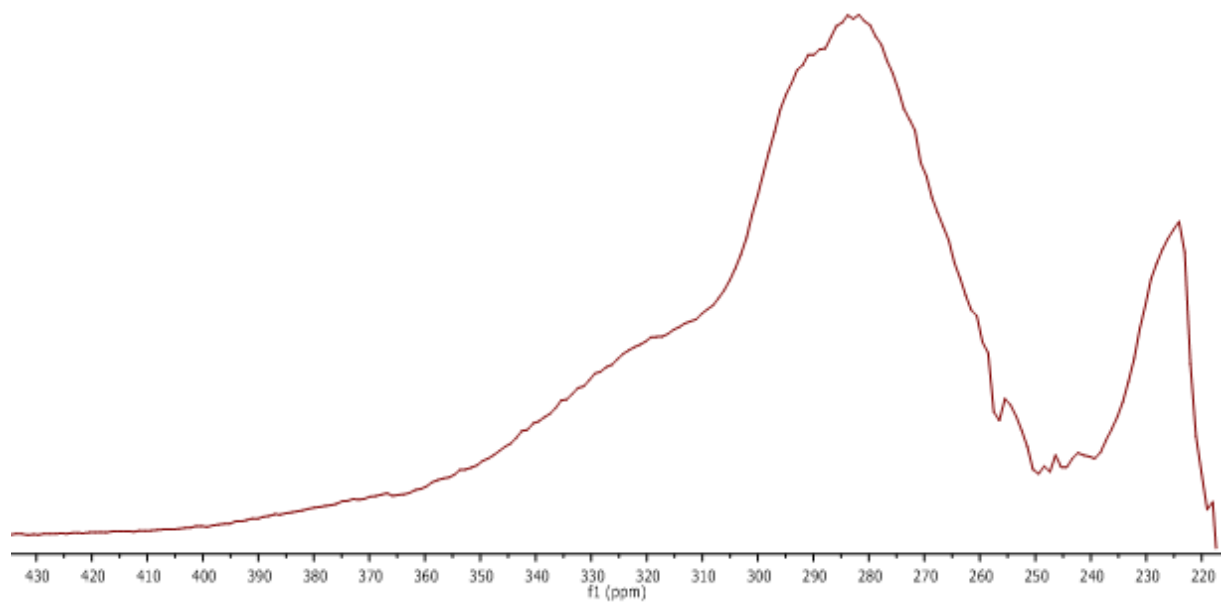

**Figure S8:** Experimental UV spectrum of the compound NMDH

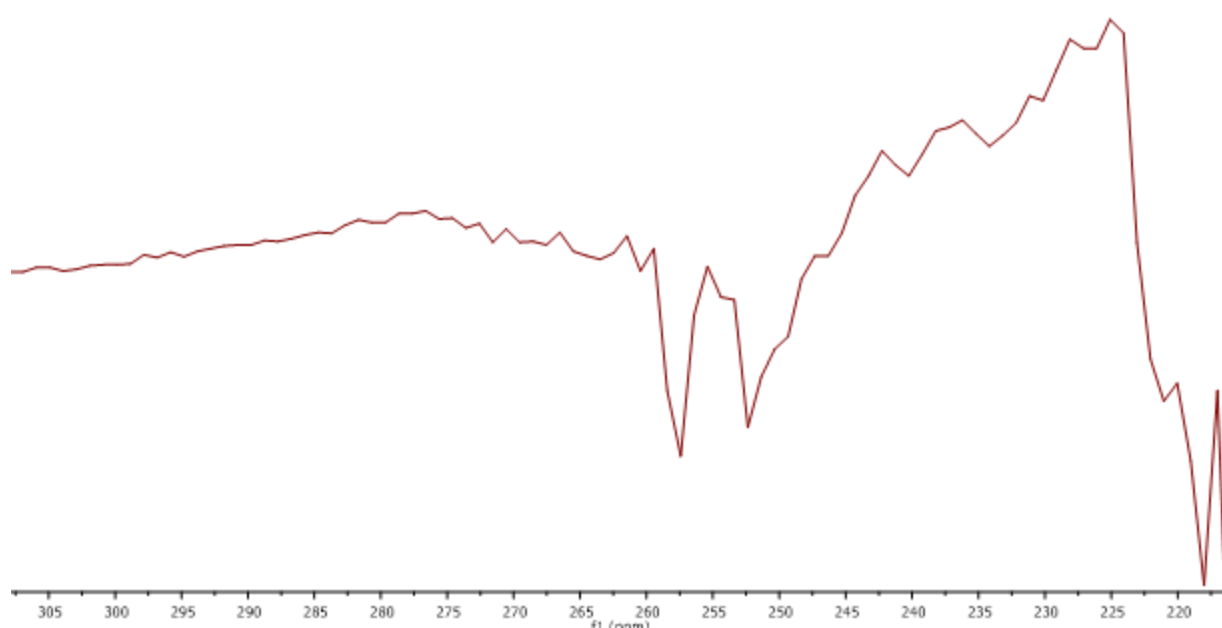

**Figure S9:** Experimental UV spectrum of the compound **FBDH**

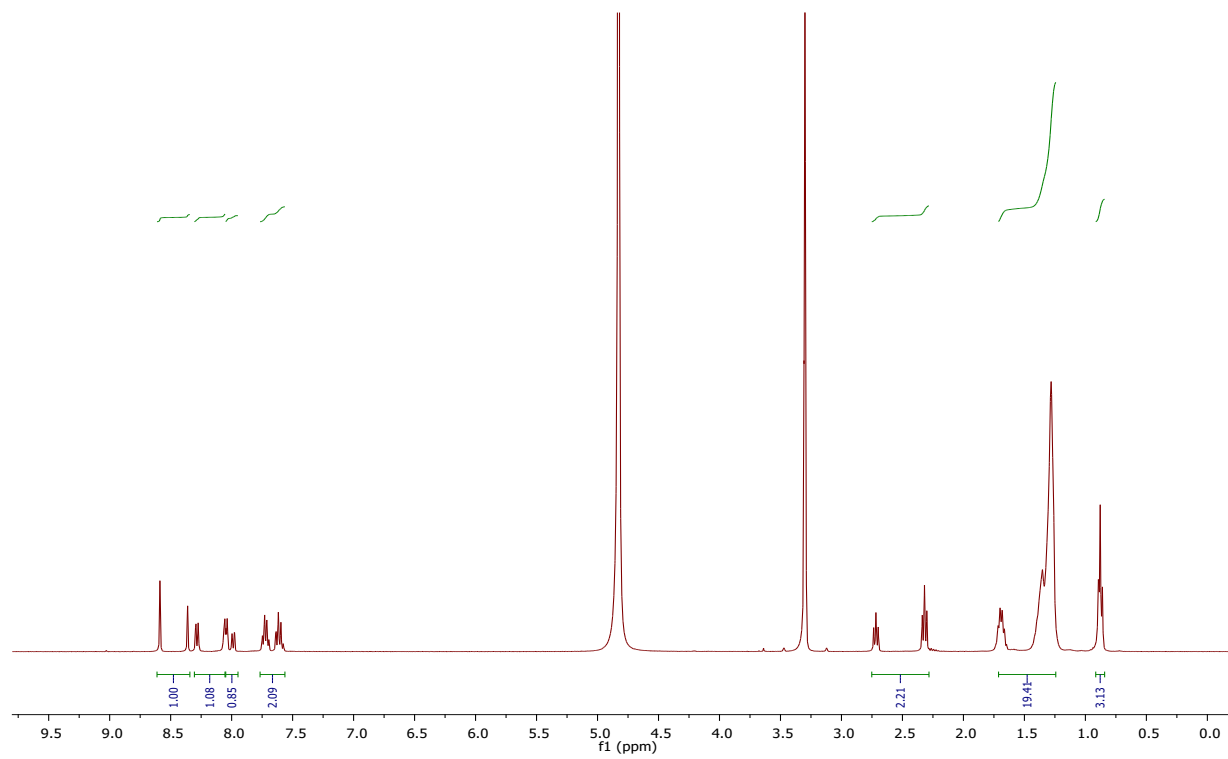

**Figure S10:** <sup>1</sup>H spectrum of (*E*)-*N'*-(2-nitrobenzylidene)dodecanehydrazide (NBDH).

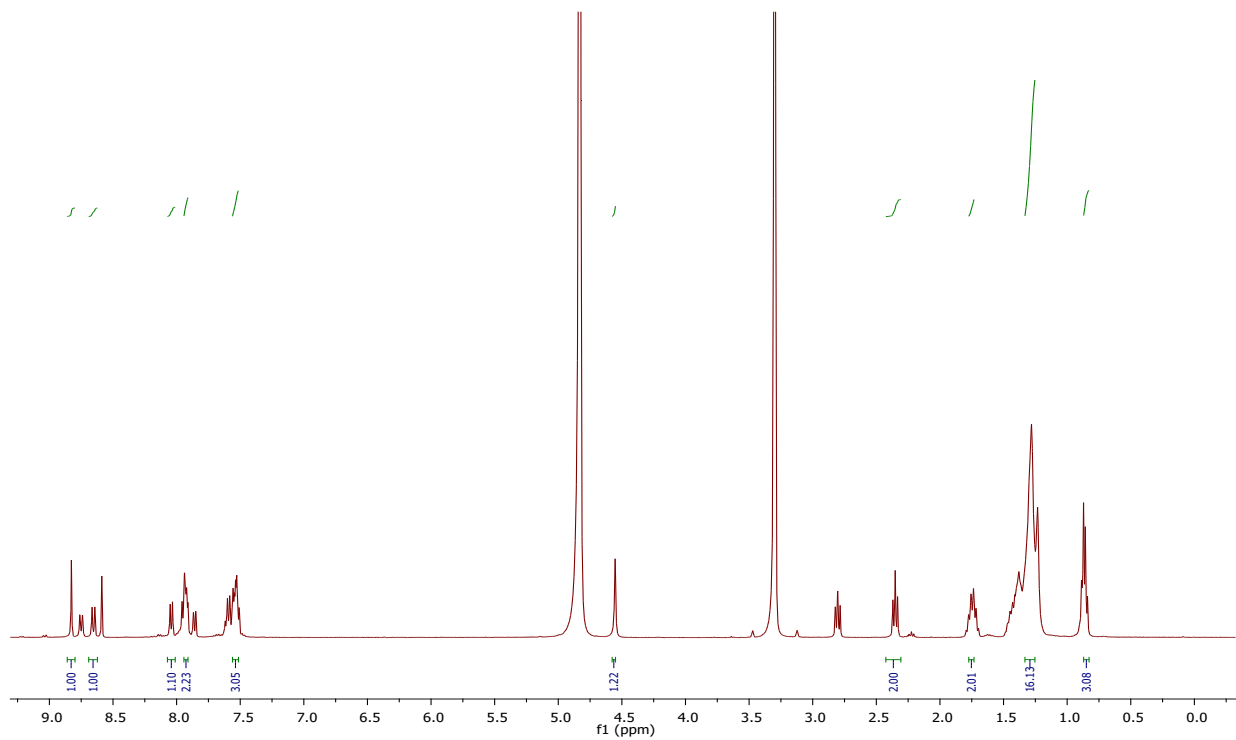

**Figure S11:**  $^1\text{H}$  spectrum of (*E*)- $\text{N}'$ -(naphthalen-1-ylmethylene)dodecanehydrazide (NMDH).

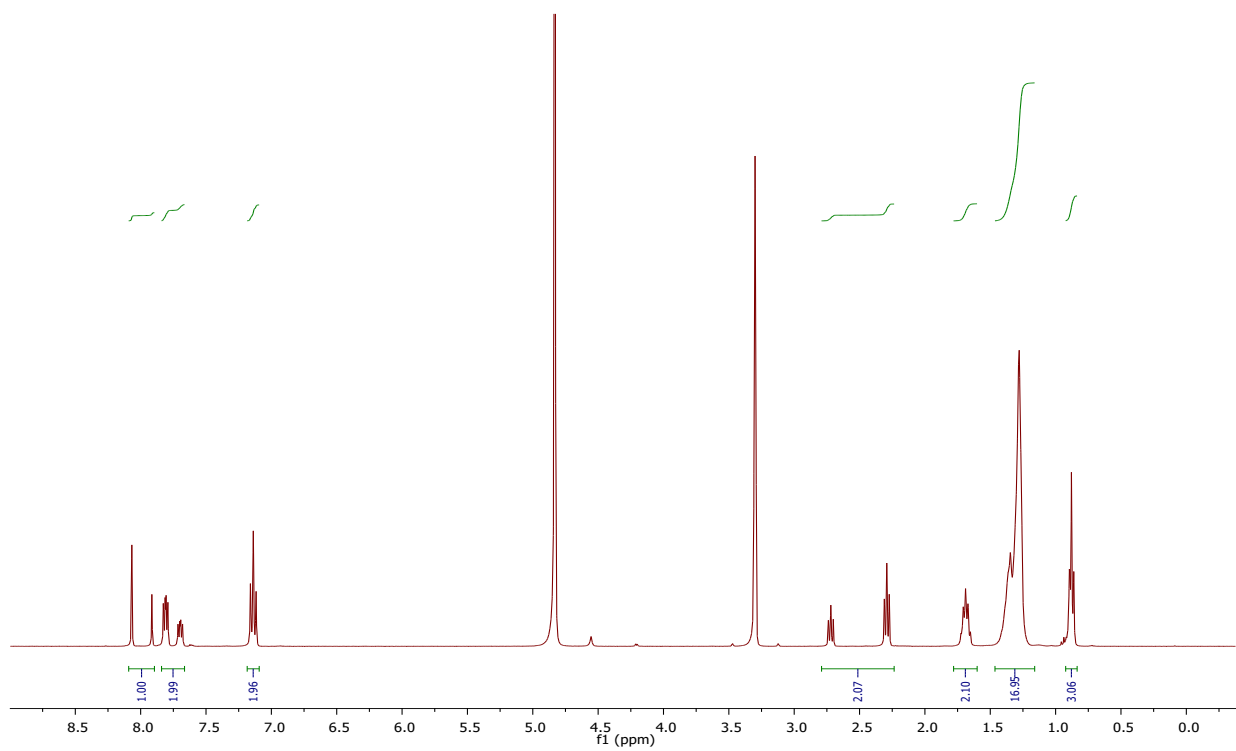

**Figure S12:**  $^1\text{H}$  spectrum of (*E*)- $\text{N}'$ -(4-fluorobenzylidene)dodecanehydrazide (FBDH).

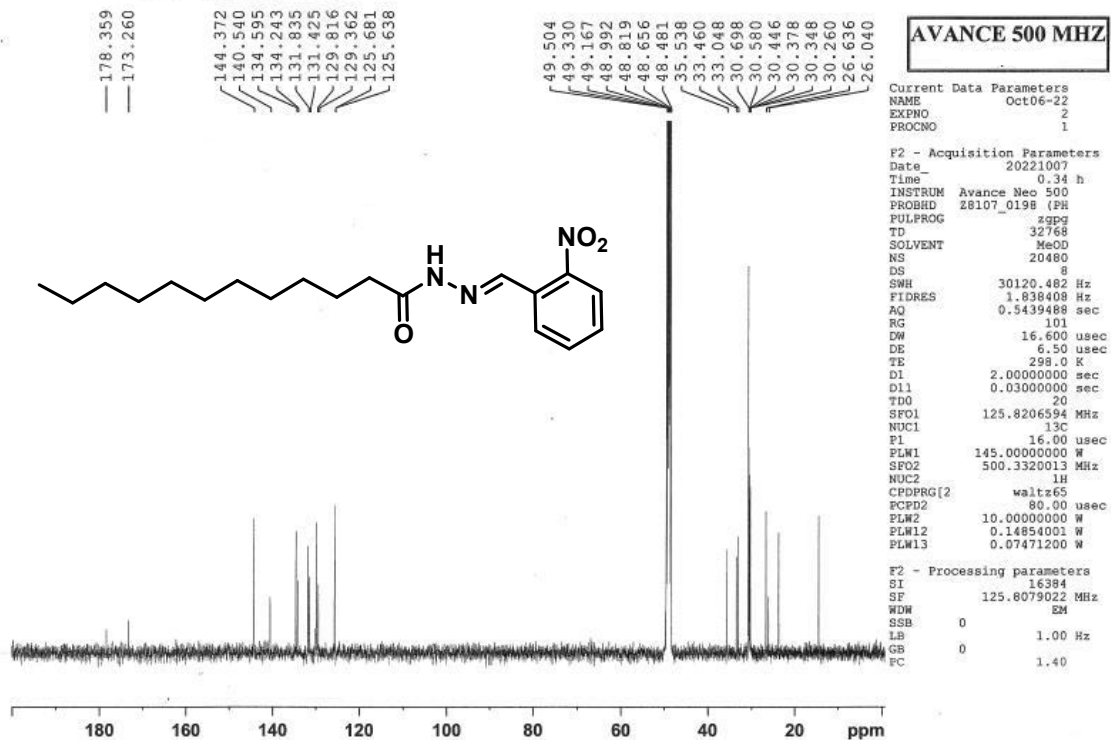

Figure S13: <sup>13</sup>C-NMR spectrum of NBDH.



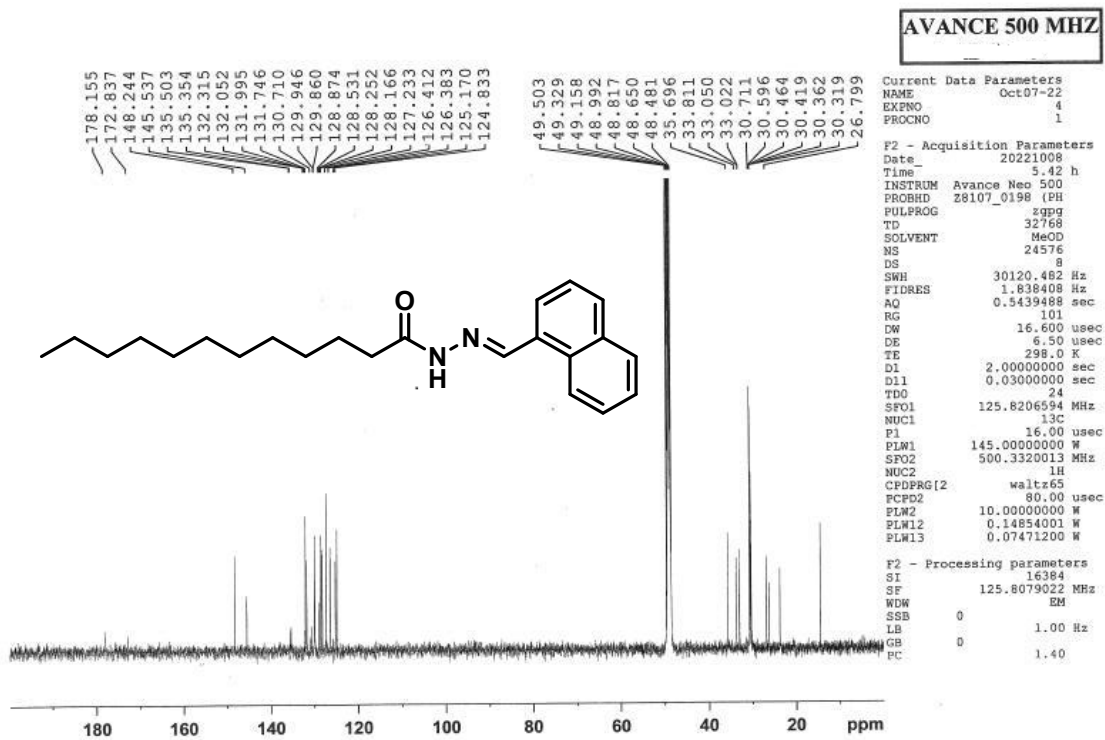

Figure S14: <sup>13</sup>C-NMR spectrum of NMDH.

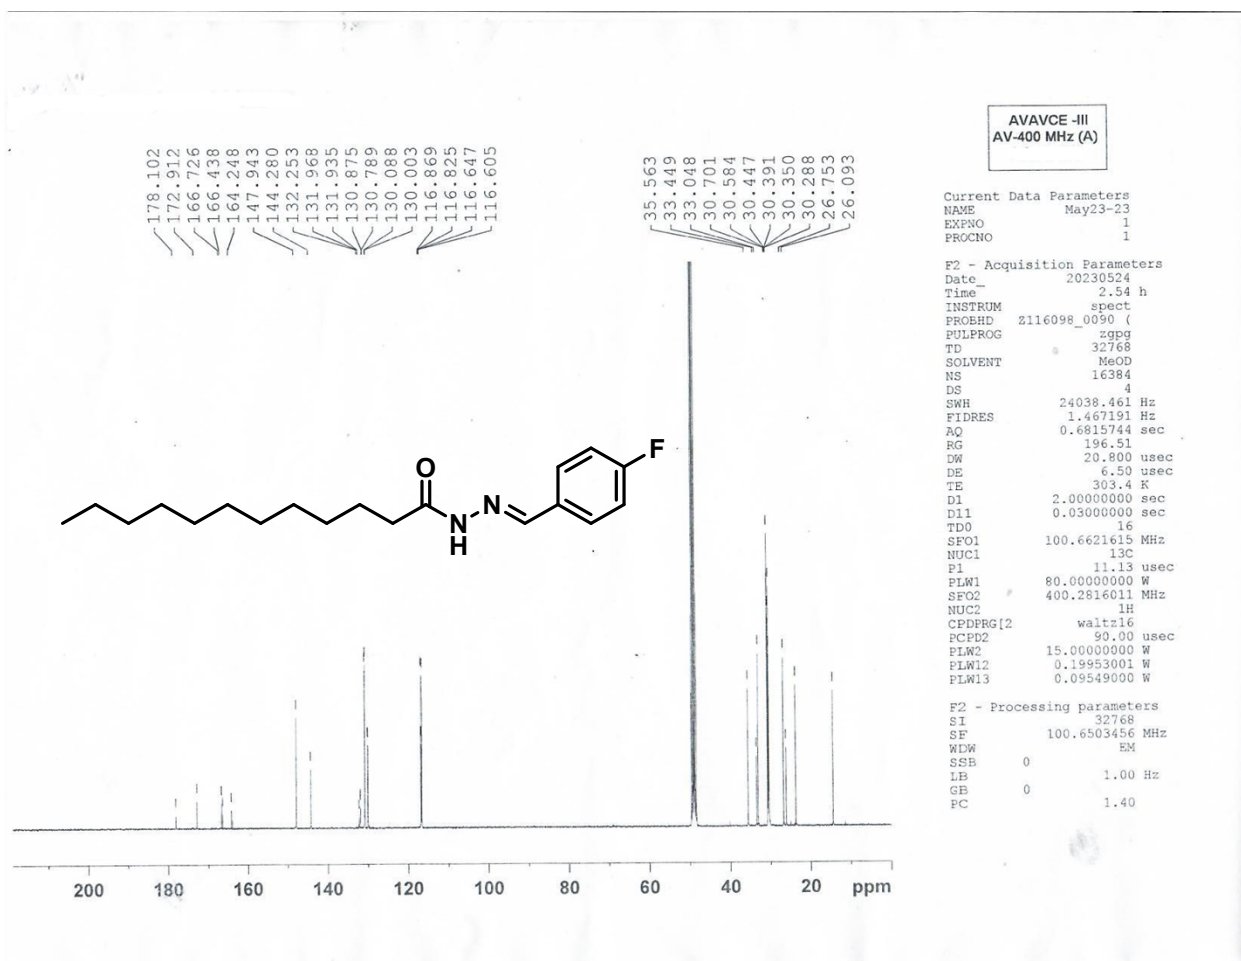

Figure S15: <sup>13</sup>C-NMR spectrum of FBDH.
